# Estradiol Signaling via Sequestrable Surface Receptors

W. PETER M. BENTEN, CHRISTIAN STEPHAN, MICHÈLE LIEBERHERR, AND  
FRANK WUNDERLICH

*Division of Molecular Parasitology and Centre of Biological-Medical Research, Heinrich-Heine-University, 40225 Duesseldorf, Germany, Centre National de la Recherche Scientifique, Unité Propre de Recherche 1524, Institute National de la Recherche Agronomique, 78352 Jouy-en-Josas, France*

## ABSTRACT

Estradiol ( $E_2$ )-signaling is widely considered to be exclusively mediated through the transcription-regulating intracellular estrogen receptor (ER)  $\alpha$  and ER $\beta$ . The aim of this study was to investigate transcription-independent  $E_2$ -signaling in mouse IC-21 macrophages.  $E_2$  and  $E_2$ -BSA induce a rapid rise in the intracellular free  $Ca^{2+}$  concentration ( $[Ca^{2+}]_i$ ) of Fura-2 loaded IC-21 cells as examined by spectrofluorometry. These changes in  $[Ca^{2+}]_i$  can be inhibited by pertussis toxin, but not by the ER-blockers tamoxifen and raloxifene.

The  $E_2$ -signaling initiated at the plasma membrane is mediated through neither ER $\alpha$  nor ER $\beta$ , but rather through a novel G protein-coupled membrane  $E_2$ -receptor as revealed by RT-PCR, flow cytometry, and confocal laser scanning microscopy. A special feature of this  $E_2$ -receptor is its sequestration upon agonist stimulation. Sequestration depends on energy and temperature, and it proceeds through a clathrin- and caveolin-independent pathway. (*Endocrinology* 142: 1669–1677, 2001)

ESTROGENS exert a broad spectrum of activities on a wide variety of cells and tissues and are also known to promote cancer of the mammary gland and endometrium. According to the current view, estrogens mediate their activities through transcription-regulating intracellular estrogen receptors (iER). These proteins contain several domains for estrogen binding, nuclear localization, dimerization, DNA-binding, and transactivation that impart iERs the ability to activate or repress specific estrogen-responsive genes (1–5). For a long time, it has been accepted that there exists only one type of receptor, now termed iER $\alpha$ . Recent findings, however, have revealed the existence of still another intracellular receptor, the so-called iER $\beta$  (6–10).

There is also increasing evidence for transcription-independent actions of estrogens, as for other steroid hormones too (11). These actions manifest themselves as rapid responses of target cells in the range of seconds to minutes. For instance,  $E_2$  can induce a fast rise in the intracellular free  $Ca^{2+}$  concentration ( $[Ca^{2+}]_i$ ) due to influx of external  $Ca^{2+}$  and/or release of  $Ca^{2+}$  from intracellular  $Ca^{2+}$  stores (12–17). Such nongenomic actions are initiated at the plasma membrane and are postulated to be mediated by plasma membrane-associated estrogen receptors (mER). The current debate focuses on the nature and properties of these mERs. There is some evidence that the mER is identical with at least one form of the iER. For instance, Pappas *et al.* have shown in pituitary cells that the mER is very similar—if not identical—with iER, because mER cross-reacts with iER-recognizing antibodies (18). In accordance, recent transfection studies with iER $\alpha$  and iER $\beta$  complementary DNAs in CHO cells have revealed about 3% of both iER $\alpha$  and iER $\beta$  in plasma

membrane enriched fractions (19). However, there are also reports stating that the mER is different to iER $\alpha$  and iER $\beta$  (13, 20–22). Here, we show the existence of mER in the murine macrophage cell line IC-21 with totally different properties as hitherto revealed: the mER is neither ER $\alpha$  nor ER $\beta$ , but is a G protein-coupled receptor which mediates both  $Ca^{2+}$  mobilization and  $Ca^{2+}$  influx, and which is sequestrable upon agonist stimulation.

## Materials and Methods

### Cell culture

Cells of the mouse macrophage cell line IC-21 were obtained from the American Type Culture Collection (ATCC-No. TIB-186; Manassas, VA) and were grown in IMDM medium/L-glutamine (Life Technologies, Inc., Eggenstein, Germany) supplemented with 10% FCS, 50  $\mu$ M  $\beta$ -mercaptoethanol and 3.024 g NaHCO<sub>3</sub> at 37 C, 5% CO<sub>2</sub> and 96% humidity. They were subcultured once per week for maximally eight passages and incubated in serum-free medium for 24 h before experimentation.

### Chemicals

17 $\beta$ -estradiol ( $E_2$ ), 17 $\beta$ -estradiol 6-(O-carboxymethyl)oxime/BSA ( $E_2$ -BSA), 17 $\alpha$ -estradiol, tamoxifen, nifedipine, verapamil, and pertussis toxin were from Sigma (St. Quentin, Fallavier, France), and raloxifene from Eli Lilly & Co. (Saint-Cloud, France). 1-(6-((17 $\beta$ -3-methoxyestra-1,3,5(10)-trien-17-yl)-amino)hexyl)-1H-pyrrole-2,5-dione (U-73122) and 1-(6-((17 $\beta$ -3-methoxyestra-1,3,5(10)-trien-17-yl)-amino)-hexyl)-2,5-pyrrolidone-2,5-dione (U-73343) were from BIOMOL Research Laboratory (Plymouth, MA). Fura-2/AM was from Amersham Pharmacia Biotech (Les Ulis, France). 17 $\beta$ -estradiol 6-(O-carboxymethyl)oxime: BSA-fluoresceine isothiocyanate conjugate ( $E_2$ -BSA-FITC) was from Sigma (Deisenhofen, Germany) and Concanavalin A (Con A)-rhodamine from Vector (Burlingame, CA). Vectashield was delivered from Vector (Burlingame, CA) and 1,4-diazobicyclo-[2.2.2]octane (DABCO) from Merck & Co., Inc. (Darmstadt, Germany).

### $Ca^{2+}$ measurement

IC-21 cells were assayed for  $[Ca^{2+}]_i$  as described (23). In brief, cells were grown on poly-L-lysine-coated glass coverslips until confluence and then loaded with 1  $\mu$ M Fura-2/AM for 30 min at room temperature. The  $Ca^{2+}$  was measured in a temperature-controlled (37 C) Hitachi

Received March 2, 2000.

Address all correspondence and requests for reprints to: Prof. Dr. F. Wunderlich, Division of Molecular Parasitology, Heinrich-Heine-University, Universitätsstrasse 1, 40225 Duesseldorf, Germany. E-mail: frank.wunderlich@uni-duesseldorf.de.

F-2000 spectrofluorometer. Steroids and reagents were added directly to the cuvette under continuous stirring (13, 15). Estrogens were dissolved in ethanol; the final concentration of ethanol never exceeded 0.01%, and this concentration had no effect on  $[Ca^{2+}]_i$ .  $E_2$ -BSA was treated with charcoal to remove any free  $E_2$  or 17 $\beta$ -estradiol 6-(O-carboxymethyl)-oxime (24). Charcoal treatment had no effect on the ability of  $E_2$ -BSA to increase  $[Ca^{2+}]_i$  (13). The Fura-2 fluorescence response to  $[Ca^{2+}]_i$  was calibrated from the ratio of the 340/380 nm fluorescence values after subtraction of the background fluorescence of the cells at 340 nm and 380 nm (25). The dissociation constant of Fura-2- $Ca^{2+}$  complex was taken as 224 nM. The values for  $R_{max}$  and  $R_{min}$  were calculated from measurements made using 25  $\mu$ M digitonin, and 4 mM EGTA and enough Tris base to raise the pH to 8.3 or higher. Each measurement on Fura-2 loaded cells was followed by a parallel experiment under identical conditions with cells not loaded with Fura-2.

### Labeling with $E_2$ -BSA-FITC

IC-21 cells were washed twice with phosphate-buffered salt solution (PBS<sup>+</sup>; 140 mM NaCl, 2.7 mM KCl, 6.4 mM Na<sub>2</sub>HPO<sub>4</sub>, 1.4 mM KH<sub>2</sub>PO<sub>4</sub>, 0.5 mM MgCl<sub>2</sub>, 0.9 mM CaCl<sub>2</sub>, pH 7.2), and incubated at the indicated temperatures for varying periods with  $1.5 \times 10^{-5}$  M  $E_2$ -BSA-FITC, or with BSA-FITC or BSA alone as controls. For internalization experiments, intact IC-21 cells were incubated at room temperature or 37°C for 15 min or 1 h with  $E_2$ -BSA-FITC, BSA-FITC or Con A-rhodamine (1:50) or a rat antimouse F4/80 antibody (2  $\mu$ g/ml; gift from H. Mossmann, MPI for Immunobiology, Freiburg, Germany) and with Biotin-SP-conjugated AffiniPure mouse antirat IgG (H+L) (1:500; Jackson ImmunoResearch Laboratories, Inc., West Grove, PA) as a secondary antibody and streptavidin-fluoresceine (6  $\mu$ g/ $10^7$  cells; Amersham Pharmacia Biotech, Braunschweig, Germany). Colocalization was performed in intact cells using LysoTracker Red DND-99 (10  $\mu$ M; Molecular Probes, Inc., Göttingen, Germany) or transferrin conjugated with tetramethylrhodamine (20  $\mu$ g/ml; Molecular Probes, Inc., Göttingen, Germany). Then, the samples were postfixed with 1% paraformaldehyde (PFA) (26). Cells prefixed with 0.5% PFA were incubated with the anticlathrin antibody HC (N-19) (2  $\mu$ g/ml; Santa Cruz Biotechnology, Inc., Heidelberg, Germany) and with a donkey antigoat-Cy3 antibody (1:200; gift from P. Traub, MPI for Cell Biology, Ladenburg, Germany) as secondary antibody, or with the anti-caveolin antibody caveolin-1 (N-20) (2  $\mu$ g/ml; Santa Cruz Biotechnology, Inc.) using a TRITC-conjugated AffiniPure goat antirabbit IgG (H+L) antibody (1:80; Jackson ImmunoResearch Laboratories, Inc.) as secondary antibody. The cells were postfixed with 3% PFA (23).

### Localization of ER

Intact IC-21 cells as well as cells prefixed with 0.5% PFA and permeabilized with PBS<sup>+</sup> containing 0.05% Tween-20 and 0.5% BSA were labeled with the different ER-antibodies ER $\alpha$  (MC-20), ER $\alpha$  (H-184), and ER $\beta$  (Y-19) (all Santa Cruz Biotechnology, Inc.) in concentrations of 2  $\mu$ g/ml for 1 h at room temperature. Antirabbit IgG (whole molecule) FITC conjugate (working dilution 1:320; Sigma, Deisenhofen, Germany) and a donkey antigoat-FITC antibody (working dilution 1:100; gift from P. Traub, MPI for Cell Biology, Ladenburg, Germany) were used as secondary antibodies for 45 min. The cells were postfixed with 1% PFA (23, 26).

### Confocal laser scanning microscopy

IC-21 cells ( $2 \times 10^6$  cells/ml) were allowed to adhere onto poly-L-lysine-coated glass coverslips overnight, then labeled as described above, and embedded in a 1:1 (vol/vol) mixture of glycerol and vectashield containing 2% (wt/vol) DABCO (23). The confocal laser scanning microscope (CLSM) Leica Corp. TCS NT version 1.5451 (Leica Corp. Lasertechnik, Heidelberg, Germany) was used for analysis of the specimens with FITC fluorescence excitation at 488 nm or Cy3 and TRITC fluorescence at 568 nm, respectively. Z-series optical sections taken at 0.5  $\mu$ m intervals were evaluated using Adobe Photoshop 5.0 for Windows and Corel-Draw 8 for Windows (15, 27).

### Flow cytometry

Aliquots of 150  $\mu$ l IC-21 cells ( $10^7$  cells/ml in PBS<sup>+</sup>) were centrifuged, and the cell pellets were labeled as described above. Cells were analyzed in a FACScan (Becton Dickinson and Co., Sunnyvale, CA) with a sample size of 10,000 cells gated on the basis of forward and side scatter. The data were stored and processed using the FACScan software (26).

### RNA isolation

RNA was isolated from IC-21 cells and ovaries removed from 8- to 10-week-old C57BL/10 mice according to the GTC/CsCl method (28).

### RT-PCR

The initial random-primed RT was performed with 1  $\mu$ g of total RNA, M-MLV Reverse Transcriptase (Promega Corp., Madison), dNTPs (PCR Nucleotide Mix; Roche Molecular Biochemicals, Mannheim, Germany), and random primer (Perkin-Elmer Corp., Weiterstadt, Germany) in a MJ Minicycler (MJ Research, Inc., Biozym, Hess. Oldendorf, Germany) for 10 min at 25°C, 1 h at 42°C and 5 min at 95°C. Thereafter, the samples were purified with a QIAquick PCR Purification Kit (QIAGEN, Hilden, Germany). For PCR, we used the template complementary DNA, Taq DNA Polymerase (Promega Corp., Madison, WI), dNTPs (PCR Nucleotide Mix; Roche Molecular Biochemicals), and six different oligonucleotide primer pairs. The carboxy terminus of the ER $\alpha$  was probed with two different primer pairs: (1) ER $\alpha$ P2-1434 (5'-ACAGGAATCAAGG-TAAATGTGTGG-3') and ER $\alpha$ M1-1807 (5'-CTCCAGGAGCAGGT-CATAGAGG-3'); as well as (2) ER $\alpha$ P9-1350 (5'-GGCTGGAGATTCTG-ATGATGG-3') and ER $\alpha$ M5-1935 (5'-GGGTATGTAGTAGGTTGTG-AGG-3'). The primer pair (3) ER $\alpha$ P16-589 (5'-CTACTACCTGGAG-AACGAGCC-3') and ER $\alpha$ M21-1029 (5'-GAAGCACCCATTTCATT-TCCGC-3') was used for the DNA-binding domain of ER $\alpha$ . The DNA-binding domain of ER $\beta$  was probed with the primer pair (4) ER $\beta$ P5-224 (5'-CTTGCCTGTAAACAGAGAGACC-3') and ER $\beta$ M4-709 (5'-GACG-GCTCACTAGCACATTGG-3'). The steroid binding domain of the ER $\beta$  was probed with the primer pairs (5) ER $\beta$ P7-710 (5'-CAATGTGCTAGT-GAGCCGTCC-3') and ER $\beta$ M4-1209 (5'-CTGCTGTGGGAAGAGAT-TCC-3') and (6) ER $\beta$ P3-855 (5'-CAAGTCCGCCTCTTGAAAGC-3') and ER $\beta$ M1-1160 (5'-CATCTGTCACTGCGTTCAATAGG-3'). The amplification was performed with 36 cycles at 94°C for 1 min, at 56°C for 1 min, and at 72°C for 1 min and at the end of the last cycle for 15 min at 72°C.

### DNA sequencing

PCR fragments were separated in 2% Tris borate-EGTA gels, eluted, and cloned into the vector pGEM-TEasy (Promega Corp., Madison). The clones were sequenced with Thermo Sequenase fluorescent-labeled sequencing kit (Amersham Pharmacia Biotech), and analyzed with the LICOR sequencer (MWG Biotech, Ebersberg, Germany).

## Results

### $E_2$ -induced rise in $[Ca^{2+}]_i$

At the physiological concentration of 1 nM, 17 $\beta$ -estradiol ( $E_2$ ) induced a rapid increase in  $[Ca^{2+}]_i$  by about 90–150 nM within 5 sec (Fig. 1A). This  $Ca^{2+}$  rise dropped after 20–40 sec and, then, turned into a sustained plateau. At 0.1 nM,  $E_2$  caused a weaker  $Ca^{2+}$  spike by only about 50 nM  $Ca^{2+}$  (Fig. 1A). In contrast, 17 $\alpha$ -estradiol did not induce any significant increase in  $[Ca^{2+}]_i$  (Fig. 1A). Moreover, a rise in  $[Ca^{2+}]_i$  could also be induced by 100 nM plasma membrane-impermeable  $E_2$ -BSA conjugate, whereas BSA alone did not influence the  $[Ca^{2+}]_i$  (Fig. 1B). It is not clear why 100 times higher  $E_2$ -BSA concentrations were required to elicit the same response as free  $E_2$ . One reason may be that, because of steric hindrance, only one or two of the  $E_2$  molecules bound to BSA are able to induce a  $Ca^{2+}$  response. Another reason may be that coupling of  $E_2$  to BSA via carboxymethyl oxime (CMO) re-

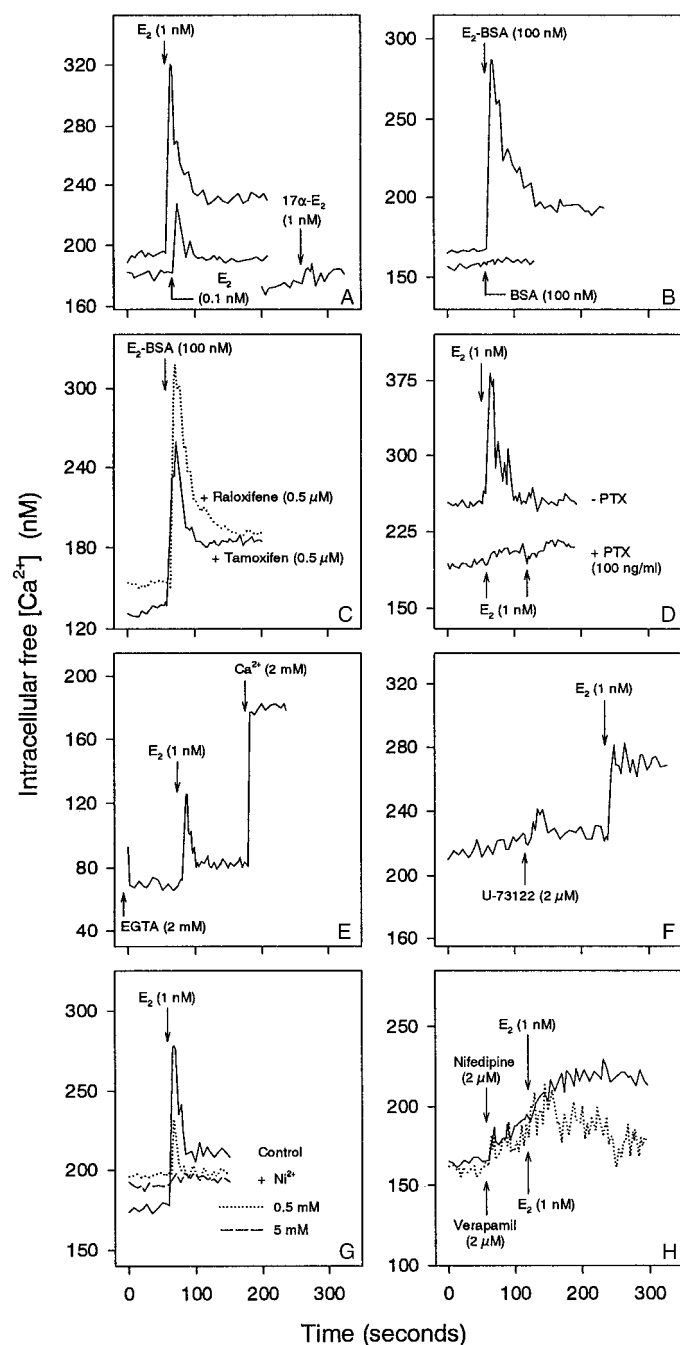

FIG. 1. Calcium responses of confluent IC-21 cells to estrogens. A,  $17\beta$ -estradiol ( $E_2$ ) but not  $17\alpha$ -estradiol ( $17\alpha$ - $E_2$ ) induce a dose-dependent increase in  $[Ca^{2+}]_i$ . B,  $E_2$  conjugated to BSA also induces a transient  $Ca^{2+}$  spike, but not BSA alone. C, Preincubation with raloxifene and tamoxifen for 4 h does not prevent the  $E_2$ -BSA-induced  $Ca^{2+}$  spike. D, Incubation of cells with 100 ng/ml pertussis toxin for 16 h (+ PTX) inhibits the  $E_2$  effect on  $[Ca^{2+}]_i$ . E, The  $E_2$ -induced  $Ca^{2+}$  spike is lowered by removal of external  $Ca^{2+}$  with 2 mM EGTA. F, Preincubation with the direct phospholipase C inhibitor U-73122 for 2 min reduced the  $E_2$ -induced rise in  $[Ca^{2+}]_i$  by about 50%. G, Pretreatment of cells with different concentrations of the  $Ca^{2+}$  channel blocker  $Ni^{2+}$  for 5 min gradually inhibited the  $E_2$ -induced  $Ca^{2+}$  spike. H, The two blockers of voltage-gated  $Ca^{2+}$  channels nifedipine and verapamil reduced the  $E_2$ -induced increase in  $[Ca^{2+}]_i$ . Arrows indicate addition of the indicated substances.

duces the capacity of  $E_2$  to increase  $[Ca^{2+}]_i$  (13). In this context, it is also noteworthy that we removed any  $E_2$  and  $E_2$ -CMO possibly released from  $E_2$ -BSA with the stripped-charcoal technique described by Lieberherr *et al.* (13). Repeated additions of  $E_2$  or  $E_2$ -BSA leads to repeated  $Ca^{2+}$  spikes (23). Even a pretreatment of IC-21 cells with 1 or 10 nM  $E_2$  for 4 h did not reduce the  $Ca^{2+}$  response to  $E_2$  (data not shown). Pretreatment of cells with tamoxifen or raloxifene, which are blockers of classical iERs, prevented neither the  $E_2$ -BSA-induced nor the  $E_2$ -induced increase in  $[Ca^{2+}]_i$  (Fig. 1C). However, pertussis toxin totally inhibited the  $E_2$ -induced  $Ca^{2+}$  spike (Fig. 1D).

The  $E_2$ -induced rise in  $[Ca^{2+}]_i$  may be due to influx of extracellular  $Ca^{2+}$  and/or release of  $Ca^{2+}$  from intracellular  $Ca^{2+}$  stores. When extracellular  $Ca^{2+}$  was first removed by EGTA, 1 nM  $E_2$  induced a smaller  $Ca^{2+}$  spike by only about 40–60 nM, due to the release of  $Ca^{2+}$  from intracellular  $Ca^{2+}$  stores (Fig. 1E). When intracellular  $Ca^{2+}$  mobilization was inhibited by the direct phospholipase C inhibitor U-73122, there was still an  $E_2$ -induced increase in  $[Ca^{2+}]_i$  due to influx of extracellular  $Ca^{2+}$  (Fig. 1F). Partial inhibition of  $Ca^{2+}$  increase was achieved with  $Ni^{2+}$  concentrations known to inhibit the release of  $Ca^{2+}$  from intracellular stores (Fig. 1G, 0.5 mM), whereas the influx was completely inhibited by higher  $Ni^{2+}$  concentrations that also block plasma membrane  $Ca^{2+}$  channels (Fig. 1G, 5 mM). Also, the  $E_2$ -induced  $Ca^{2+}$  influx could be reduced with the two blockers of voltage-gated  $Ca^{2+}$  channels nifedipine (L-type channels) and verapamil (Fig. 1H).

#### Sequestrable surface $E_2$ -binding sites

To test the presence of putative surface  $E_2$ -receptors, the IC-21 cells were incubated with the ligand  $E_2$ -BSA-FITC conjugate. After labeling for 5 sec, flow cytometry detected a significant increase in fluorescence intensity compared with unlabeled control cells (Fig. 2A). However, the fluorescence intensity increased gradually with progressing labeling periods reaching a maximum after about 1 h (Fig. 2A). In parallel, the cells were investigated by confocal laser scanning microscopy (CLSM). After labeling for 5 sec and 1 min, the fluorescence was exclusively localized on the cell surface. After 5 min, however, weak punctate fluorescence emerged inside of the cells at their periphery, besides surface fluorescence. This punctate fluorescence increased in intensity after labeling for 1 h and was distributed throughout the whole cytoplasm (Fig. 2B).

The internalized punctate  $E_2$ -BSA-FITC was not contained in acidic vesicles (Fig. 3A). The latter were stained with LysoTracker Red DND-99 and did not colocalize with the green punctate fluorescence of  $E_2$ -BSA-FITC (Fig. 3A). Also, the sequestered  $E_2$ -BSA-FITC colocalized neither with clathrin as detected by anti-clathrin antibodies (Fig. 3B) and by transferrin-tetramethylrhodamin, which is an indicator of sequestration through clathrin-coated vesicles (Fig. 3C), nor with caveolin as monitored by anticaveolin antibodies (Fig. 3D). The internalization process could be inhibited by treatment of cells with hypertonic medium (Fig. 3E) but not by the tubulin-blocker nocodazole and the microfilament-blocker cytochalasin B (data not shown).



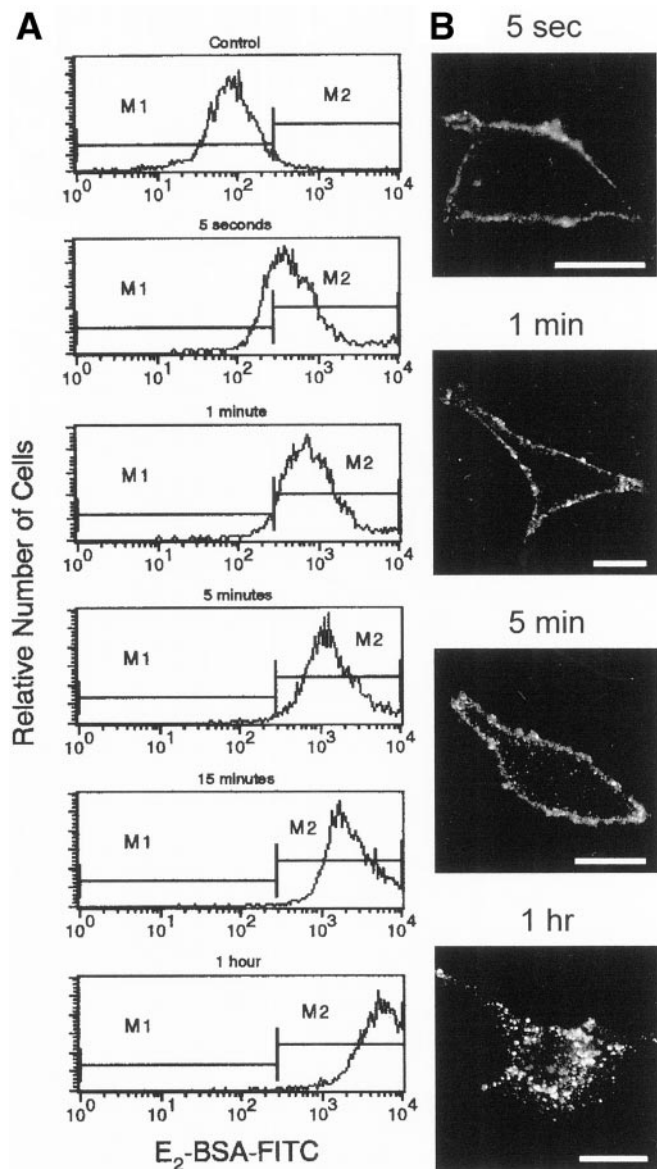

FIG. 2. Sequestration of surface bound  $E_2$ -BSA-FITC. Cells were labeled with  $E_2$ -BSA-FITC for varying periods, and fluorescence was recorded by flow cytometry (A) and CLSM (B). Bars represent 10  $\mu$ m. M1, Area of unlabeled cells. M2, Area of  $E_2$ -BSA-FITC labeled cells.

#### Specificity of $E_2$ -receptor sequestration

The internalization of surface  $E_2$ -receptors was selective. Incubation of cells with either BSA or BSA-FITC alone, or in combination with 1 nM  $E_2$  for 15 min did not induce any sequestration, whereas control cells incubated with  $E_2$ -BSA-FITC revealed sequestered fluorescence (Fig. 4, A and B). Moreover, internalization occurred neither with surface-bound ConA-rhodamine nor with the macrophage specific surface marker F4/80 identified by a rat monoclonal antibody against F4/80, even if the surface labelings were performed in the presence of  $E_2$  (Fig. 4B).

The binding and the internalization of  $E_2$ -BSA-FITC were competitively reduced by  $17\beta$ - $E_2$  and  $17\beta$ - $E_2$ -BSA but not by  $17\alpha$ -estradiol (Fig. 5A). By contrast, pretreatment of cells with  $17\beta$ - $E_2$  for 2 h before incubation with  $E_2$ -BSA-FITC alone

did not prevent sequestration (Fig. 3F). Neither testosterone nor testosterone-BSA nor 1-dehydrotestosterone were able to competitively reduce the sequestration of  $E_2$ -BSA-FITC (Fig. 5A). Pretreatment of IC-21 macrophages with pertussis toxin resulted in a decrease of internalized fluorescence intensity (Fig. 5A). However, the phospholipase C inhibitor U-73122 as well as its inactive control compound U-73343 did not block the internalization of surface-bound  $E_2$ -BSA-FITC (data not shown). Furthermore, the internalization of membrane  $E_2$ -receptors depended on energy. Depletion of ATP by sodium azide resulted in a decrease of the fluorescence intensity by about 30% (Fig. 5A), which was localized almost exclusively on the surface of IC-21 cells. Finally, the sequestration of membrane  $E_2$ -receptors was also dependent on temperature. Temperatures at 16 C and below largely inhibited the sequestration of surface-bound  $E_2$ -BSA-FITC. By contrast, the binding of  $E_2$ -BSA-FITC to the cell surface was not affected by temperature (Fig. 5B).

#### Intracellular ER

The presence of iER $\alpha$  and iER $\beta$  in IC-21 cells was first examined by RT-PCR. Using different primers of the carboxy terminus and the DNA-binding domain of ER $\alpha$ , RT-PCR revealed the expected bands of ER $\alpha$  in IC-21 cells and mouse uterus, which was used as a positive control (Fig. 6A). DNA sequencing confirmed that the PCR fragments derived from uterus and IC-21 cells contained the predicted regions of the ER $\alpha$ . However, RT-PCR did not detect any ER $\beta$  in IC-21 cells, whereas the uterus was ER $\beta$  positive (Fig. 6A). In accordance, incubation of IC-21 cells with the anti-ER $\beta$  antibody ER $\beta$  (Y-19) directed against an epitope corresponding to the amino terminus of the ER $\beta$  did not result in any significant labeling of intact or permeabilized IC-21 cells as detected by flow cytometry and CLSM (data not shown).

ER $\alpha$  was predominantly localized in the cytoplasm and to a lesser extent in the nucleus as detected in permeabilized cells by CLSM using the anti-ER $\alpha$  antibody ER $\alpha$  (MC-20) directed against an epitope in the carboxy terminus of the ER $\alpha$  as well as the anti-ER $\alpha$  antibody ER $\alpha$  (H-184) directed against an epitope in the amino terminus of the ER $\alpha$  (Fig. 6C). Both antibodies specifically reacted with permeabilized cells, because the antibody reaction could be competitively displaced by specific blocking peptides as revealed by flow cytometry (Fig. 6B). However, ER $\alpha$  was not accessible on the outer surface of intact cells as probed by flow cytometry (Fig. 6B) and CLSM (data not shown) using the two different ER $\alpha$  antibodies described above. Furthermore, no sequestration of peripheral ER $\alpha$  was found. After 1 h labeling with the anti-ER $\alpha$  antibodies in the presence of  $E_2$ , there was no increase in fluorescence intensity of intact cells. Moreover, when intact IC-21 cells were incubated with the ER $\alpha$  (MC-20) antibody and, in parallel, with  $E_2$ -BSA-FITC for 1 h, CLSM did reveal only internalized  $E_2$ -BSA-FITC, but not any internalized ER $\alpha$  (data not shown; see Fig. 2B).

#### Discussion

This study provides evidence for the existence of a transcription-independent  $E_2$ -signaling pathway in the mouse macrophage cell line IC-21. Indeed,  $E_2$  at physiological con-

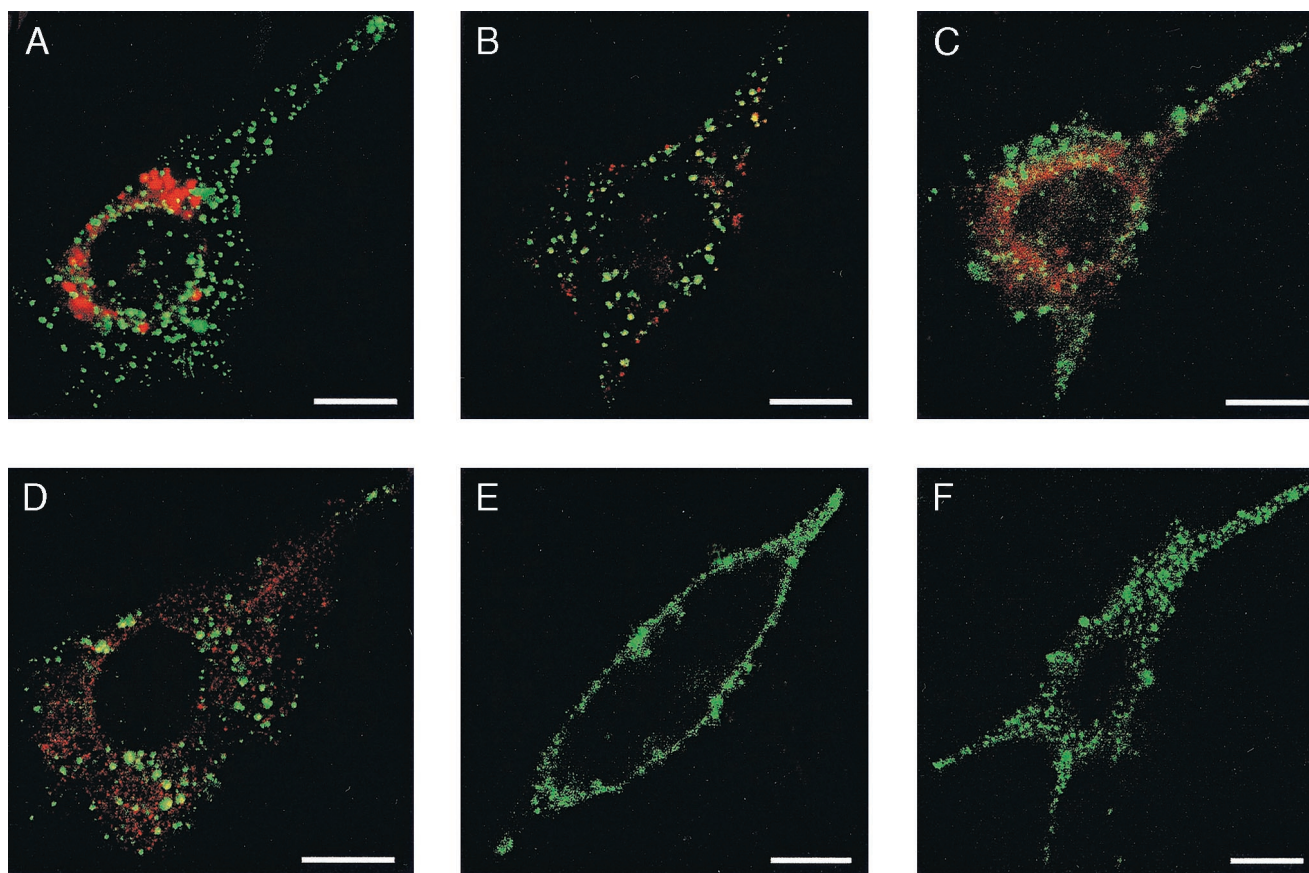

FIG. 3. CLSM colocalization of the sequestered surface binding sites of  $E_2$ . A, Parallel labeling of IC-21 cells with  $E_2$ -BSA-FITC and LysoTracker Red DND-99, a marker of acidic vesicles, at 37 C for 1 h did not result in colocalization. B, Sequestration of  $E_2$ -BSA-FITC is independent of clathrin-coated vesicles as detected by an anti-clathrin antibody and the Cy3-labeled secondary antibody. C, Internalized  $E_2$ -BSA-FITC did not colocalize with internalized red transferrin-tetramethylrhodamine. D, No colocalization was observed after incubation of cells with  $E_2$ -BSA-FITC and an anti-caveolin antibody detected by TRITC-conjugated antibody. E, Pretreatment of cells with 0.45 M sucrose for 30 min inhibited the sequestration of  $E_2$ -BSA-FITC. F, Preincubation of IC-21 cells with 100 nM  $E_2$  for 2 h did not prevent the internalization of  $E_2$ -BSA-FITC. Bars represent 10  $\mu$ m.

centrations induces a rapid rise in  $[Ca^{2+}]_i$ , which is due to both influx of external  $Ca^{2+}$  and release of  $Ca^{2+}$  from intracellular  $Ca^{2+}$  stores. This is in accordance with previous results also showing  $E_2$ -induced  $Ca^{2+}$  rise due to both influx of extracellular  $Ca^{2+}$  and intracellular  $Ca^{2+}$  mobilization in rat osteoblasts (13), mouse T cells (15), and pig granulosa cells (29). However, there are also data showing only  $E_2$ -induced influx of  $Ca^{2+}$  in LNCaP human prostate cancer cells (14) and human spermatozoa (16) or only  $E_2$ -induced intracellular  $Ca^{2+}$  mobilization in chicken granulosa cells (12) and human peripheral monocytes (17). In IC-21 cells, the  $Ca^{2+}$  influx is not only a simple diffusion process but rather proceeds through  $Ca^{2+}$  channels that are completely blockable by  $Ni^{2+}$  and, in part, by nifedipine and verapamil. These data are in line with previous studies also showing that the  $E_2$ -induced rapid  $Ca^{2+}$  influx proceeds through  $Ca^{2+}$  channels, though the type of  $Ca^{2+}$  channels involved appears to depend on the cell type. For instance, there exist  $Ni^{2+}$ -sensitive  $Ca^{2+}$  channels in T cells (15) and pig granulosa cells (29), whereas osteoblasts contain predominantly voltage-gated  $Ca^{2+}$  channels (13).

The  $E_2$ -induced increase in  $[Ca^{2+}]_i$  of IC-21 cells is initiated on the cell surface via specific  $E_2$ -receptors. This view is

supported by our findings that also the plasma membrane-impermeable ligand  $E_2$ -BSA induces a rise in  $[Ca^{2+}]_i$ . In addition, the fluorescent conjugate  $E_2$ -BSA-FITC specifically binds to the surface of intact IC-21 cells as detected by flow cytometry and CLSM. Moreover, our data show that the rise in  $[Ca^{2+}]_i$  can be blocked by pertussis toxin, and the phospholipase C inhibitor U-73122 inhibits the release of intracellular  $Ca^{2+}$ . Obviously, the surface  $E_2$ -receptors belong to that class of membrane receptors which are coupled to phospholipase C via a pertussis toxin-sensitive G protein. In accordance, recent studies show that  $E_2$  activates  $\beta\gamma$  subunits of a pertussis toxin-sensitive G protein coupled to a PLC- $\beta$ 2 in osteoblasts (21, 30).

The plasma membrane G protein-coupled receptors for  $E_2$  ( $E_2$ -GPCR) in IC-21 cells exhibit properties that are typically found for other G protein-coupled receptors (GPCR). For instance, a wide variety of GPCRs, as *e.g.* the prototypic  $\beta_2$ -adrenergic receptor and the angiotensin II type 1A receptor, become sequestered after ligand binding (31–33). Also, the  $E_2$ -GPCR become sequestered a few minutes after binding of  $E_2$  as visualized by labeling with  $E_2$ -BSA-FITC. This internalization process is ligand-specific, *i.e.* internalization of  $E_2$ -BSA-FITC is competitively inhibited by  $17\beta$ - $E_2$  and



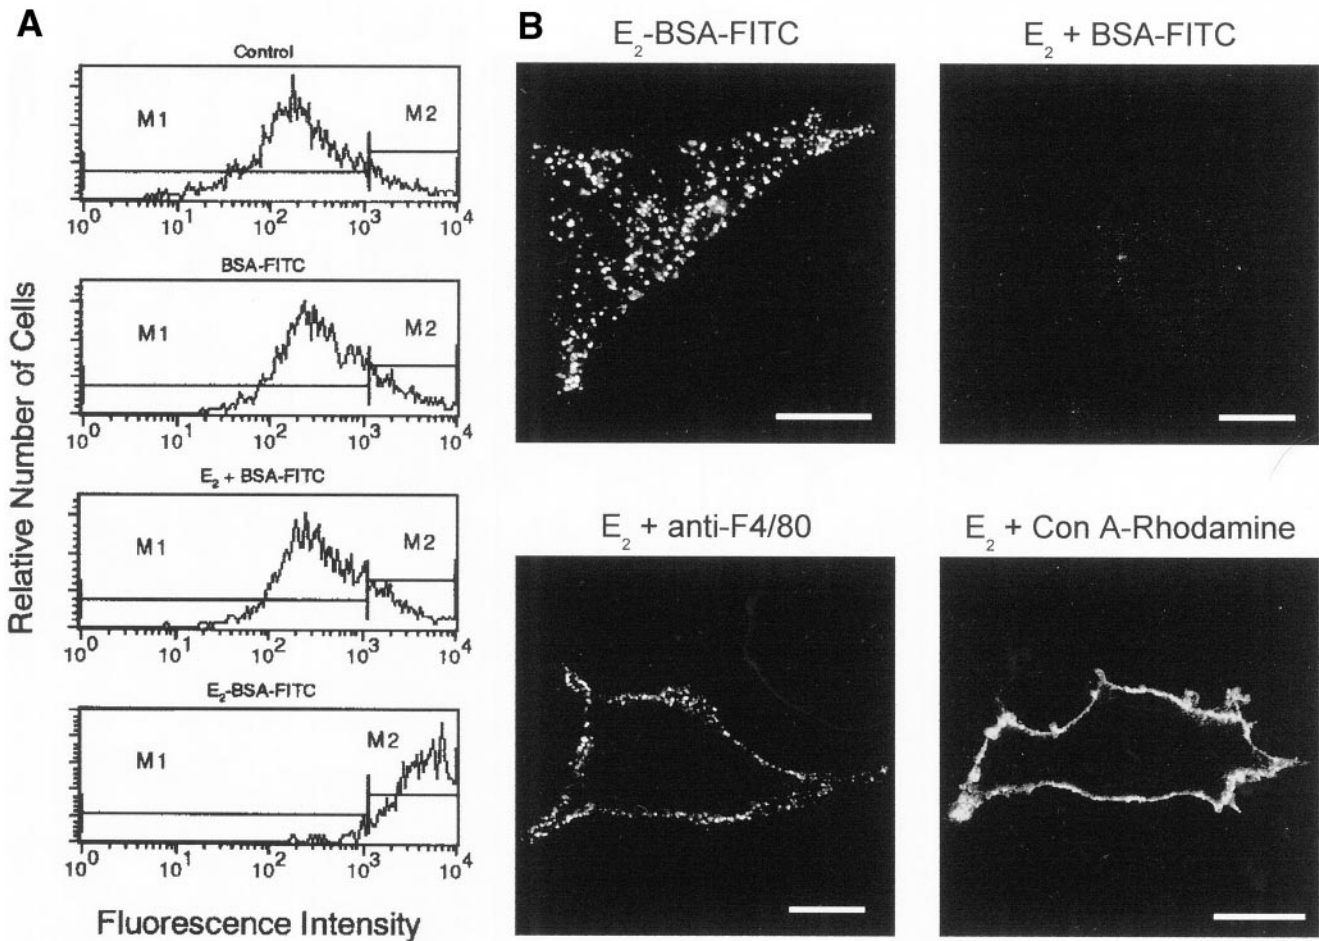

FIG. 4. Selective sequestration of  $E_2$ -surface binding sites. A, Flow cytometric analysis of IC-21 cells incubated with the indicated substances for 15 min. B, CLSM analysis of IC-21 cells incubated with the indicated substances for 15 min revealed internalization only in  $E_2$ -BSA-FITC-treated cells, but not in cells incubated with the other indicated substances. Bars represent 10  $\mu$ m.

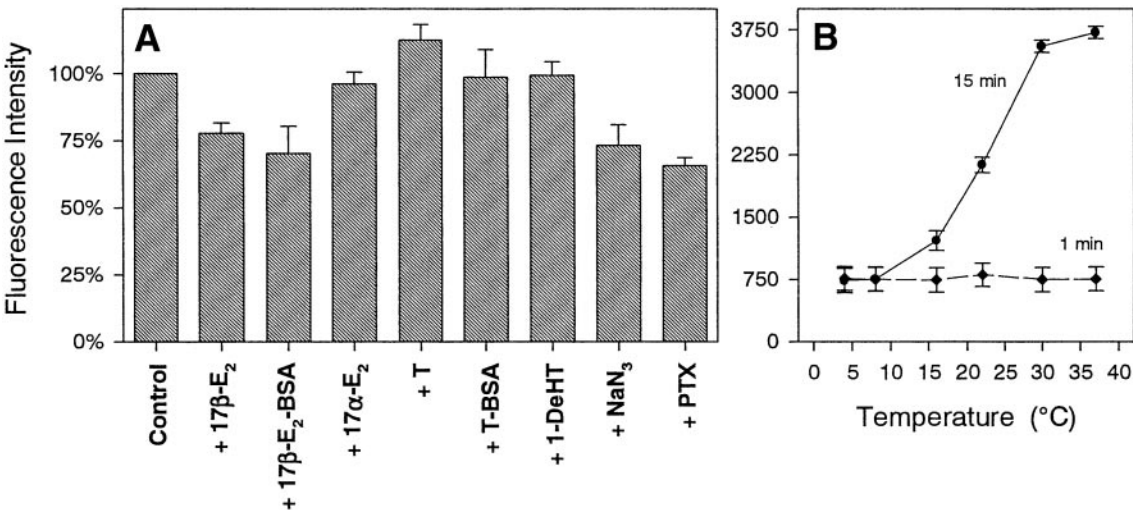

FIG. 5. Specificity of  $E_2$ -BSA-FITC sequestration. A, IC-21 cells were incubated for 15 min with  $E_2$ -BSA-FITC ( $10^{-6}$  M) in the absence (control) or in the presence of a 10-fold excess of different unlabeled hormones. Fluorescence intensity was analyzed by flow cytometry. Values normalized to controls are given as means  $\pm$  SD from four different experiments. B, Cells were preincubated for 30 min at the indicated temperatures and then treated with  $1.5 \times 10^{-5}$  M  $E_2$ -BSA-FITC for 1 min or 15 min at the same temperatures. Values represent means  $\pm$  SD from at least two different experiments.

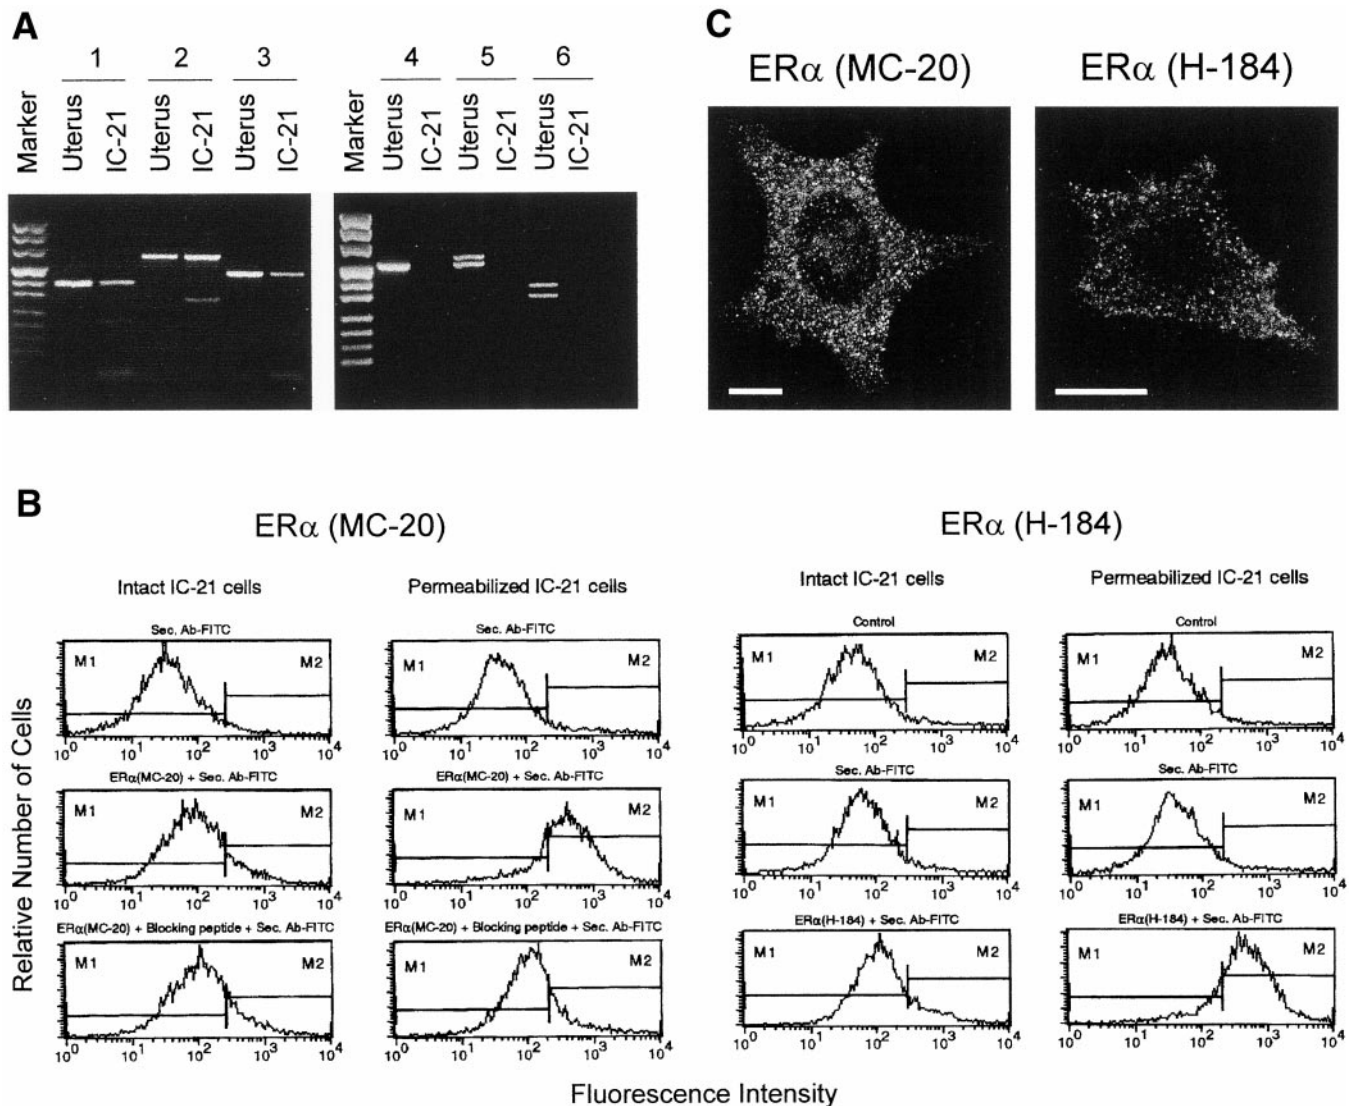

FIG. 6. Occurrence and localization of ER $\alpha$  and ER $\beta$ . A, RT-PCR with RNA isolated from mouse uterus and IC-21 cells, with markers (pUC mix, MBI Fermentas) on the left. The two primer pairs (1) ER $\alpha$ P2-1434/ER $\alpha$ M1-1807 and (2) ER $\alpha$ P9-1350/ER $\alpha$ M5-1935 spanned regions of the carboxy terminus of ER $\alpha$ . The primer pair (3) ER $\alpha$ P16-589/ER $\alpha$ M21-1029 was used for the DNA-binding domain of ER $\alpha$ . The DNA-binding domain of ER $\beta$  was probed with the primer pair (4) ER $\beta$ P5-224/ER $\beta$ M4-709 and the steroid binding domain of the ER $\beta$  with the primer pairs (5) ER $\beta$ P7-710/ER $\beta$ M4-1209 and (6) ER $\beta$ P3-855/ER $\beta$ M1-1160. B, Flow cytometry of intact and permeabilized IC-21 cells incubated for 1 h with two different ER $\alpha$  antibodies and their secondary FITC-labeled antibodies (Sec. Ab-FITC). The blocking peptide ER $\alpha$  (MC-20)P cannot competitively displace the slight increase in fluorescence of ER $\alpha$  (MC-20)-treated intact cells in contrast to permeabilized cells, where it totally blocks the strong fluorescence induced by ER $\alpha$  (MC-20) and its secondary fluorescent antibody. C, ER $\alpha$  is predominantly localized in the cytoplasm of permeabilized cells as revealed by CLSM using the anti-ER $\alpha$  antibodies ER $\alpha$  (MC-20) and ER $\alpha$  (H-184). Bars represent 10  $\mu$ m.

17 $\beta$ -E<sub>2</sub>-BSA, but not by 17 $\alpha$ -estradiol and internalization depends on temperature and energy. Moreover, pertussis toxin reduces sequestration, indicating that E<sub>2</sub>-GPCR internalization is dependent on Ca<sup>2+</sup>. In addition, E<sub>2</sub>-GPCR internalization is selective, *i.e.* only distinct plasma membrane domains are internalized, which exclude, for example, macrophage-specific surface molecules such as F4/80. In general, the sequestration of GPCR occurs via the clathrin-coated vesicle-mediated endocytotic pathway (34–36) or via caveolae (37, 38). The clathrin pathway can be prevented by hypertonic media (39–41). Also, we can find in IC-21 cells that the E<sub>2</sub>-GPCR internalization is inhibited by hypertonic sucrose. Nevertheless, the E<sub>2</sub>-GPCR sequestration is medi-

ated by a clathrin- and caveolin-independent pathway because there is no colocalization of vesicles containing E<sub>2</sub>-BSA-FITC with caveolin, clathrin, and transferrin. In accordance, there is some information available that internalization of GPCRs does not necessarily occur through clathrin- or caveolin-dependent pathways (35, 42). In general, GPCR sequestration is considered to be important for regulation of signaling, recycling, down-regulation and responsiveness or essential for the activation of specific signal transduction factors (33, 43–45). Though the reason for E<sub>2</sub>-induced E<sub>2</sub>-GPCR internalization is still unknown, a possible down-regulation does not seem very likely because pretreatment of cells with E<sub>2</sub> for 2 h did not prevent sequestration of



E<sub>2</sub>-GPCRs and pretreatment for 4 h did not reduce the Ca<sup>2+</sup> response to E<sub>2</sub>. Thus, it seems more plausible that internalization of E<sub>2</sub>-GPCR may be involved in the activation of specific signaling pathways.

Surface estrogen receptors, identical or structurally related to at least one form of the iER, have been recently localized in various cells such as GH<sub>3</sub>/B6 rat pituitary tumor cells (18, 46), human monocytes (17), rabbit uterus cells (47), and transfected hamster ovary cells (19). By contrast, the surface E<sub>2</sub>-GPCR of IC-21 cells are neither ER $\alpha$  nor ER $\beta$ . The latter is not expressed in IC-21 cells at all, and ER $\alpha$  is not accessible on the outer surface of intact cells, but can only be detected intracellularly, *i.e.* in the cytoplasm and to a lesser extent in the nucleus of permeabilized IC-21 cells. In accordance, other studies have also revealed that classical ERs can be localized in both the cytoplasm and the nucleus (48–51). On the basis of the cytoplasmic localization of ER $\alpha$ , it could be argued that a possible tight association of ER $\alpha$  with the cytoplasmic surface of the plasma membrane could lead to an activation of this ER $\alpha$  by E<sub>2</sub>-BSA. However, this can be excluded because E<sub>2</sub>-BSA conjugates bind to neither ER $\alpha$  nor ER $\beta$  as recently shown using several different assays (52). Moreover, ER $\alpha$  reveals properties which are clearly distinct from those of the E<sub>2</sub>-GPCR on the surface of IC-21 macrophages. For instance, ER $\alpha$  cannot be induced to be internalized by E<sub>2</sub> or E<sub>2</sub>-BSA-FITC, in contrast to the E<sub>2</sub>-GPCR, though Kim *et al.* have demonstrated the occurrence of ER $\alpha$  in plasmalemmal caveolae (53). Moreover, the iER-blockers tamoxifen and raloxifene have no inhibitory effect on the rapid rise in [Ca<sup>2+</sup>]<sub>i</sub> of IC-21 cells induced by both E<sub>2</sub> and E<sub>2</sub>-BSA.

Recently, IC-21 cells have been also shown to contain sequestrable surface GPCRs for testosterone (T-GPCR) (23). However, T-GPCR exhibit properties different to those of E<sub>2</sub>-GPCR. First, the E<sub>2</sub>-GPCR mediates the E<sub>2</sub>-induced increase in [Ca<sup>2+</sup>]<sub>i</sub> via both Ca<sup>2+</sup> release from intracellular stores and influx of extracellular Ca<sup>2+</sup>, whereas testosterone induces, via T-GPCR, only a mobilization of Ca<sup>2+</sup> from intracellular stores. The phospholipase C inhibitor U-73122 completely blocks the testosterone-induced raise in [Ca<sup>2+</sup>]<sub>i</sub>, whereas the E<sub>2</sub>-induced raise is only reduced by approximately one half. Verapamil and nifedipine reduces the increase in [Ca<sup>2+</sup>]<sub>i</sub> after E<sub>2</sub>-treatment, whereas the testosterone-induced increase in [Ca<sup>2+</sup>]<sub>i</sub> is unaffected by these drugs. Moreover, testosterone and testosterone-BSA are not able to compete with E<sub>2</sub> for the internalization of E<sub>2</sub>-GPCR. Sequestration of T-GPCR, but not that of E<sub>2</sub>-GPCR, is inhibited by the direct phospholipase C inhibitor U-73122 as well as by nocodazole and cytochalasin B. It remains to be seen as to whether the E<sub>2</sub>-GPCR and the T-GPCR are two different receptors or there is only one receptor with different binding sites for E<sub>2</sub> and testosterone coupled to different signaling pathways.

Collectively, our data unequivocally show the presence of functional novel E<sub>2</sub>-GPCR in plasma membranes of IC-21 cells that do not mediate the classical genomic ER-response, but rather initiate a transcription-independent E<sub>2</sub>-signaling pathway involving Ca<sup>2+</sup> as one of several other possible intracellular mediators.

## References

- Evans RM 1988 The steroid and thyroid hormone receptor superfamily. *Science* 240:889–895
- O'Malley BW 1990 The steroid receptor superfamily: more excitement predicted for the future. *Mol Endocrinol* 4:363–369
- Beato M, Herrlich P, Schütz G 1995 Steroid hormone receptors: many actors search in of a plot. *Cell* 83:851–857
- Mangelsdorf DJ, Thummel C, Beato M, Herrlich P, Schütz G, Umesono K, Blumberg B, Kistner P, Mark M, Chambon P 1995 The nucleus receptor superfamily: the second decade. *Cell* 83:835–839
- Katzenellenbogen BS 1996 Estrogen receptors: bioactivities and interactions with cell signaling pathways. *Biol Reprod* 54:287–293
- Mosselman S, Polman J, Dijkema R 1996 ER $\beta$ : identification and characterization of a novel human estrogen receptor. *FEBS Lett* 392:49–53
- Brandenberger AW, Tee MK, Lee JY, Chao V, Jaffe RB 1997 Tissue distribution of estrogen receptors  $\alpha$  (ER $\alpha$ ) and  $\beta$  (ER $\beta$ ) mRNA in the midgestational human fetus. *J Clin Endocrinol Metab* 82:3509–3512
- Saunders PT 1998 Oestrogen receptor  $\beta$  (ER $\beta$ ). *Rev Reprod* 3:164–171
- Cowley SM, Parker MG 1999 A comparison of transcriptional activation by ER $\alpha$  and ER $\beta$ . *J Steroid Biochem Mol Biol* 69:165–175
- Mitchner NA, Garlick C, Steinmetz RW, Ben-Jonathan JN 1999 Differential regulation and action of estrogen receptors  $\alpha$  and  $\beta$  in GH<sub>3</sub> cells. *Endocrinology* 140:2651–2658
- Picard C 1998 Steroids tickle cells inside and out. *Nature* 392:437–438
- Morley P, Whitfield JE, Vanderhyden BC, Tsang BK, Schwartz J-L 1992 A new, nongenomic estrogen action: the rapid release of intracellular calcium. *Endocrinology* 131:1305–1312
- Lieberherr M, Grosse B, Kachkache M, Balsan S 1993 Cell signaling and estrogens in female rat osteoblasts: a possible involvement of unconventional nonnuclear receptors. *J Bone Miner Res* 8:1365–1376
- Audy MC, Vacher P, Dufy B 1996 17 $\beta$ -estradiol stimulates a rapid Ca<sup>2+</sup> influx in LNCaP human prostate cancer cells. *Eur J Endocrinol* 135:367–373
- Benten WPM, Lieberherr M, Giese G, Wunderlich F 1998 Estradiol binding to cell surface raises cytosolic free calcium in T cells. *FEBS Lett* 422:349–353
- Luconi M, Muratori M, Forti G, Baldi E 1999 Identification and characterization of a novel functional estrogen receptor on human sperm membrane that interferes with progesterone effects. *J Clin Endocrinol Metab* 84:1670–1678
- Stefano GB, Prevot V, Beauvillain J-C, Fimiani C, Welters J, Cadet P, Breton C, Pestel J, Salzter M, Bilfinger TV 1999 Estradiol coupling to human monocyte nitric oxide release is dependent on intracellular calcium transients: evidence for an estrogen surface receptor. *J Immunol* 163:3758–3763
- Pappas TC, Gametchu B, Watson CS 1995 Membrane estrogen receptors identified by multiple antibody labeling and impeded-ligand binding. *FASEB J* 9:404–410
- Razandi M, Pedram A, Greene GL, Levin ER 1999 Cell membrane and nuclear estrogen receptors (ERs) originate from a single transcript: studies of ER $\alpha$  and ER $\beta$  expressed in Chinese hamster ovary cells. *Mol Endocrinol* 13:307–319
- Hardy SP, Valverde MA 1994 Novel plasma membrane action of estrogen and antiestrogens revealed by their regulation of a large conductance chloride channel. *FASEB J* 8:760–765
- Le Mellay V, Lasmoles F, Lieberherr M 1999 G $\alpha_q$ /11 and G $\beta\gamma$  proteins and membrane effects of calcitriol and estradiol. *J Cell Biochem* 75:138–146
- Nadal A, Rovira JM, Laribi O, Leon-Quinto T, Andreu E, Ripoll C, Soria B 1998 Rapid insulinotropic effect of 17 $\beta$ -estradiol via a plasma membrane receptor. *FASEB J* 12:1341–1348
- Benten WPM, Lieberherr M, Stamm O, Wrehlke C, Guo Z, Wunderlich F 1999 Testosterone signaling through internalizable surface receptors in androgen receptor-free macrophages. *Mol Biol Cell* 10:3113–3123
- Blackmore PF, Neulen J, Lattanzio F, Beebe SJ 1991 Cell surface-binding sites for progesterone mediated calcium uptake in human sperm. *J Biol Chem* 266:18655–18659
- Gryniewicz G, Poenie MM, Tsien RY 1985 A new generation of Ca<sup>2+</sup> indicators with greatly improved fluorescence properties. *J Biol Chem* 260:3440–3450
- Benten WPM, Bettenhauser U, Wunderlich F, Van Vliet E, Mossmann H 1991 Testosterone-induced abrogation of self-healing of *Plasmodium chabaudi* malaria in B10 mice: mediation by spleen cells. *Infect Immun* 59:4486–4490
- Benten WPM, Lieberherr M, Giese G, Wrehlke C, Stamm O, Sekeris CE, Mossmann H, Wunderlich F 1999 Functional testosterone receptors in plasma membranes of T cells. *FASEB J* 13:123–133
- Sambrook J, Fritsch EF, Maniatis T 1989 Molecular Cloning: A Laboratory Manual. Cold Spring Harbor Laboratory Press, Cold Spring Harbor, NY
- Lieberherr M, Grosse B, Machelon V 1999 Phospholipase C- $\beta$  and ovarian sex steroid in pig granulosa cells. *J Cell Biochem* 74:50–60
- Le Mellay V, Grosse B, Lieberherr M 1997 Phospholipase C  $\beta$  and membrane action of calcitriol and estradiol. *J Biol Chem* 272:11902–11907
- Von Zastrow M, Kobilka BK 1994 Antagonist-dependent and -independent steps in the mechanism of adrenergic receptor internalization. *J Biol Chem* 269:18448–18452
- Moore RH, Sadovnikoff N, Hoffenberg S, Liu SB, Woodford P, Angelides K, Trial J, Carsrud NDV, Dickey BF, Knoll B 1995 Ligand-stimulated  $\beta_2$ -



- adrenergic receptor internalization via the constitutive endocytic pathway into rab5-containing endosomes. *J Cell Sci* 108:2983–2991
33. Koenig JA, Edwardson JM 1997 Endocytosis and recycling of G protein-coupled receptors. *Trends Pharmacol Sci* 18:276–287
  34. Doxsey SJ, Brodsky FM, Blank GS, Helenius A 1987 Inhibition of endocytosis by anticlathrin antibodies. *Cell* 50:453–463
  35. Robinson MS, Watts C, Zerial M 1996 Membrane dynamics in endocytosis. *Cell* 84:13–21
  36. Zhang J, Ferguson SSG, Barak LS, Menard L, Caron MC 1996 Dynamin and  $\beta$ -arrestin reveal distinct mechanisms for G protein-coupled receptor internalization. *J Biol Chem* 271:18302–18305
  37. Chun M, Liyanage UK, Lisanti MP, Lodish HF 1994 Signal transduction of a G protein-coupled receptor in caveolae: colocalization of endothelin and its receptor with caveolin. *Proc Natl Acad Sci USA* 91:11728–11732
  38. Kiss AL, Geuze HJ 1997 Caveolae can be alternative endocytotic structures in elicited macrophages. *Eur J Cell Biol* 73:19–27
  39. Daukas G, Zigmond SH 1985 Inhibition of receptor-mediated but not fluid-phase endocytosis in polymorphonuclear leukocytes. *J Cell Biol* 101:1673–1679
  40. Heuser JE, Anderson RGW 1989 Hypertonic media inhibit receptor-mediated endocytosis by blocking clathrin-coated pit formation. *J Cell Biol* 108:389–400
  41. Hansen SH, Sandvig K, van Deurs B 1993 Clathrin and HA2 adaptors: effects of potassium depletion, hypertonic medium, and cytosol acidification. *J Cell Biol* 121:61–72
  42. Roettger BF, Rentsch RU, Pinon D, Holicky E, Hadac E, Larking JM, Miller LJ 1995 Dual pathways of internalization of the cholecystokinin receptor. *J Cell Biol* 128:1029–1041
  43. Yu SS, Lefkowitz RJ, Hausdorff WP 1993  $\beta$ -adrenergic receptor sequestration. A potential mechanism of receptor resensitization. *J Biol Chem* 268:337–341
  44. Pippig S, Andexinger S, Lohse MJ 1995 Sequestration and recycling of  $\beta_2$ -adrenergic receptors permit receptor resensitization. *Mol Pharmacol* 47:666–676
  45. Daaka Y, Luttrell LM, Ahn S, Della Rocca GJ, Ferguson SS, Caron MG, Lefkowitz RJ 1998 Essential role for G protein-coupled receptor endocytosis in the activation of mitogen-activated protein kinase. *J Biol Chem* 273:685–688
  46. Watson CS, Norfleet AM, Pappas TC, Gametchu B 1999 Rapid actions of estrogens in GH<sub>3</sub>/B6 pituitary tumor cells via a plasma membrane version of estrogen receptor- $\alpha$ . *Steroids* 64:5–13
  47. Monje P, Boland R 1999 Characterization of membrane estrogen binding proteins from rabbit uterus. *Mol Cell Endocrinol* 147:75–84
  48. Ikegami A, Inoue S, Hosoi T, Mizuno Y, Nakamura T, Ouchi Y, Orimo H 1993 Immunohistochemical detection and Northern blot analysis of estrogen receptor in osteoblastic cells. *J Bone Miner Res* 8:1103–1109
  49. Levin E, Actis AM, Lopez S 1993 Characterization of rat uterine estrogen receptors *in vivo*. *J Steroid Biochem Mol Biol* 44:277–285
  50. Lee SH 1989 Coexistence of cytoplasmic and nuclear estrogen receptors. A histochemical study on human mammary cancer and rabbit uterus. *Cancer* 64:1461–1466
  51. Lin AL, Gonzalez Jr R, Carey KD, Shain SA 1987 Gender and baboon aortic steroid hormone receptors. *Arteriosclerosis* 7:248–255
  52. Stevis PE, Deecher DC, Suhadolnik L, Mallis LM, Frail DE 1999 Differential effects of estradiol and estradiol-BSA conjugates. *Endocrinology* 140:5455–5458
  53. Kim HP, Lee JY, Jeong JK, Bae SW, Lee HK, Jo J 1999 Nongenomic stimulation of nitric oxide release by estrogen is mediated by estrogen receptor  $\alpha$  localized in caveolae. *Biochem Biophys Res Commun* 263:257–262
